# Supplementary material for: Recruitment of the lipid kinase Mss4 to the meiotic spindle pole promotes prospore membrane formation in Saccharomyces cerevisiae
Source: PubMed Central journal article supplement — Mol Biol Cell. 2023 Mar 14;34(4):ar33. doi: 10.1091/mbc.E22-11-0515 (PMC10092644; doi:10.1091/mbc.e22-11-0515), 2023-03-14
Supplement: mbc-34-ar33-s001.pdf [file mbc-34-ar33-s001.pdf]

Supplementary Materials  
*Molecular Biology of the Cell*  
Nunez *et al.*

### Supplementary Table 1. Oligonucleotides used in this study

| Oligo  | Sequence                                                                    |
|--------|-----------------------------------------------------------------------------|
| ANO475 | GATCCATGAACAGTGAAATTTTCGAAGGAAGAGTGGATGGAAGAGTTTTTT<br>GAACTTTCCGAATCTCCAAT |
| ANO476 | CGATTGGAGATTCGGAAAGTTCAAAAACTCTTCCATCCACTCTTCCTTC<br>GAAATTTCACTGTTTCATG    |
| ANO477 | ACTAAAGGGAACAAAAGCTGGGTACCCTGGTTGGTTGGAAGCATAG                              |
| ANO478 | GACTCACTATAGGGCGAATTGGAGCTCCAGGGTCCAATTGGCAGTTC                             |
| GNO04  | CCGGTAGAGGTGTGGTCAATAAG                                                     |
| GNO05  | GTGGCGCGCCGGATCCTTAGGTGATAC                                                 |
| GNO27  | CAGTAAAATTTTCGAAGGCAAAGTGGATGGCAGAGTTTTTTAACTTTCCGCATCTCCAG                 |
| GNO28  | C TGGAGATGCGGAAAGTTTAAAAAACTCTGCCATCCACTTTGCCTTCGAAATTTTACTG                |
| GNO38  | AATCTAAGTTTTTCTAGAAGTAGTATGAATAAAGACGTCGAC                                  |
| GNO39  | CCCTTTGATAACCATACTAGTATTGGAGGGATCAGTAAAG                                    |
| GNO45  | CTCCACCGCGGTGGCGGCCGCATAGCTTCAAATGTTTCTAC                                   |
| GNO46  | TCGATAAGCTTGATATCGGCAAATTAAGCCTTCGAGCGTCC                                   |
| GNO51  | GAGTCTGCAACGGCAGAAATTACATTTTTTGGTGGATGAC                                    |
| GNO52  | CGTCATCCACCAAAAATGTAATTTCTGCCGTTGCAGACTCTGATCT                              |
| GNO68  | GATCCATGCAGTAAAATTTTCGAAGGCAAAGTGGATGGCAGAGTTTTTTAACTTTCCG<br>CATCTCCAGAT   |
| GNO69  | CGATCTGGAGATGCGGAAAGTTTAAAAAACTCTGCCATCCACTTTGCCTTCGA<br>AATTTTACTGCATG     |
| GNO70  | GCGGCCGCTCTAGAAGTAGTGGATCCCATATCCAGTACACATATAC                              |
| GNO71  | GAGCGTGTATTAAGATTTTTACTATTAAC                                               |
| GNO72  | GTTTAATAGTAAAAATCTTTAATACACGCTC                                             |
| GNO73  | CTCGAGGTCGACGGTATCGATCGCCGAAATGCTCGAAAAAC                                   |
| GNO89  | GGGTACCGGGCCCCCTCGAGGGCAAATTGATGCCTTATGGT                                   |
| GNO90  | CGGCCGCTCTAGAAGTAGTGGATCCTCTTCTAGCATTTCTTCAGAC                              |
| GNO91  | CTATCCAGTACCTCAAGAAGTGATTCAGCG                                              |

GNO82 CGCTGAATCACTTCTTGAGGTACTGGATAG  
HNO161 GAAAACCCTTTTACAATTA AAAAAGGCAATTA AAAATAGAAACAAATCAACGGATCC  
CCGGGTAAATTA  
HNO162 ATACAAAAGGGGAGTTCGGATAGAATAGAAATATAGAAAATAGTTGGAAGAATTCTGA  
GCTCGTTTAAAC  
KZO49 TATGGGCCCAACAACGACGAGTTAACTATTGTG  
KZO50 TATCTCGAGCCGGTAGAGGTGTGGTCAATA  
OKZ110 AAACCCAAAAAAGAGATCGAATTCATGTTAGAGTCTTTAGCTGCTA  
OKZ115 TAGATCTCTGCAGGTTCGACGGATCCTTACTTGTTATCAGTCAGCTCGA  
OKZ189 GAGCTCCACCGCGGTGGCGGCCGCTCTAGACATAGCTTCAAATGTTTCTACTCC  
OKZ190 CAAAAGCTGGGTACCGGGCCCCCCTCGAGGCCAAATTAAGCCTTCGAGC  
OKZ253 TCGCAACGGCGACTGGCTGGAATTCATGTCAGTCTTGCGATCA  
OKZ254 AGCTTGGCTGCAGGTTCGACGGATCCTCAGTCTTTATAATTTTTCTGGTTAGG  
OKZ264 AGCTTGGCTGCAGGTTCGACGGATCCTCATTCTGGGACAGTAGTCCTTAAAC  
OKZ284 TCGCAACGGCGACTGGCTGGAATTCGTCAGTGAAGGCCATGTCAA  
OKZ285 AGCTTGGCTGCAGGTTCGACGGATCCTTAGTTATTCATGACTAGGAAGTAAATTTT  
OKZ286 TCGCAACGGCGACTGGCTGGAATTCCTATTCCACCACACTTAGACATT  
OKZ287 AGCTTGGCTGCAGGTTCGACGGATCCTTATACAGAATCTTCTATGAATTCGTAAAA  
OKZ386 ACTAAAGGGAACAAAAGCTGGGTACCATTGAAAGAACCCTCTCG  
OKZ387 ACTCACTATAGGGCGAATTGGAGCTCGGAACCGCAGATTGCTAGTAC  
OKZ390 CGCAACTCCCCTCCAATAATCGAGCTGGTATGTCTGAGGAGTTGATAAAGGA  
OKZ391 CCTTAACTGCTTTTTAAATCATCAGTTCAACTTGTGACCCAACCTT  
OKZ501 CATTGCTTAAAATATTTTGCGG  
OKZ502 CCGCAAATATTTTAAGCAATGTCTGAGGAGTTGATAAAGGAG  
OKZ503 GATTTTAATTCAATTCAATTTAGTTCAACTTGTGACCCAAC  
OKZ504 TAAATTGAATTGAATTA AAAATCGATAG  
KZO94 ACACTCTACTGGTGGTATGGACGAATTGTATAAGGGATCCGTTCTGGCTGGTTCAATTTG  
KZO100 TGTAAGCGTGACATAACTAATTACATGACTCGAGTCATACTCGCTAGAAGTTTTAGCA  
RHO32 TGTTCTTATCCTATAAGTCATACAGTTGAATTTGTTAATCTTTACTAGAAGTTGGGATTTCA  
GCACTTCGGATCCCCGGGTTA  
RHO33 AAAATACAGTAGCTTTTCATGCCTGCACAAATTTAACAAGAGTTTCATGGGGTACATTTTTAA  
TGCCTCAAGAATCGAGCTCGT

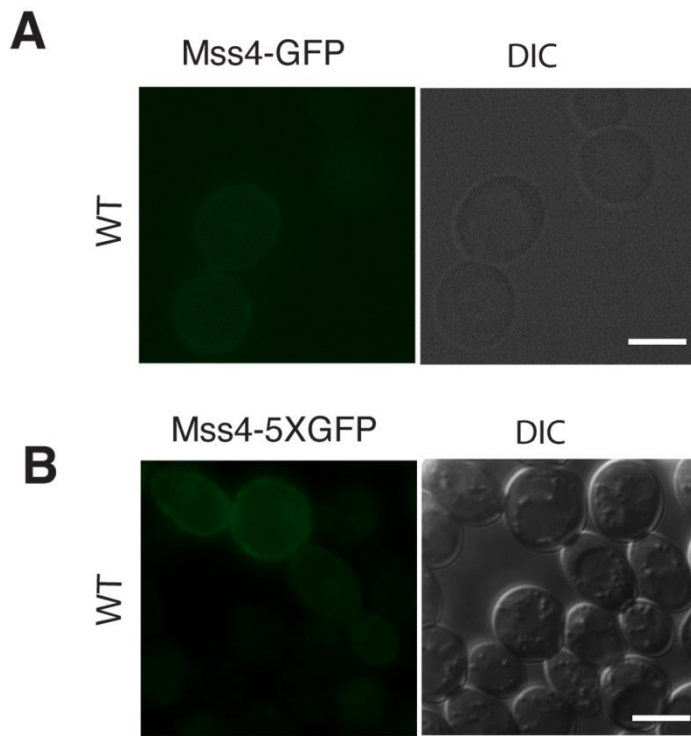

**Supplementary Figure 1. Enhanced signal from Mss4-5xGFP.**

A) Wild-type sporulating cells (AN120) transformed with plasmid expressing Mss4-GFP (pRS414-Mss4-GFP). DIC image is shown on the right. B) Wild-type sporulating cells expressing Mss4-5xGFP (pRS414-Mss4-GFP and pRS426-TEF1pr-1-10GFP). DIC image shown on the right. Scale bars = 5  $\mu$ m.
